# Supplementary material
Source: PubMed Central journal article supplement (PMC7724341)
Supplement: ajtr0012-7275-f7.pdf [file ajtr0012-7275-f7.pdf]

Reprogramming of hepatocytes into IPCs by UTMD enhanced hydrodynamic injection

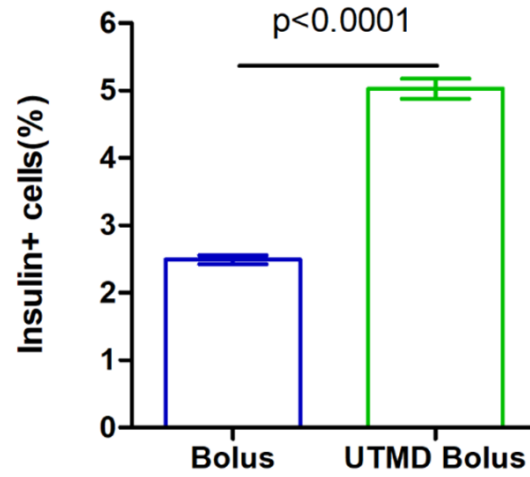

**Figure S1.** Insulin positive cells quantification. One thousand cells were selected randomly for foci quantification ( $\times 400$ ). Data are shown as mean  $\pm$  SD (n = 5).
